# Supplementary material for: Serious complications and risk of re-operation after Dupuytren’s disease surgery: a population-based cohort study of 121,488 patients in England
Source: PubMed Central journal article supplement (PMC7536429; doi:10.1038/s41598-020-73595-y), 2020-10-05
Supplement: 41598_2020_73595_MOESM1_ESM.pdf [file 41598_2020_73595_MOESM1_ESM.pdf]

## Supplementary file

### **Serious complications and risk of re-operation after Dupuytren's disease surgery: a population-based cohort study of 121,488 patients in England**

#### **Authors**

Osaïd Alser,<sup>1</sup> MSc by Research Student in Musculoskeletal Sciences  
Richard S Craig,<sup>1</sup> Royal College of Surgeons and National Joint Registry Research Fellow  
Jennifer C E Lane,<sup>1</sup> Versus Arthritis Clinical Research Fellow, MRC Doctoral Training Fellow  
Albert Prats-Urbe,<sup>2</sup> DPhil Student in Musculoskeletal Sciences  
Danielle E Robinson,<sup>2</sup> Research Associate in Pharmaco-epidemiology  
Jonathan L Rees,<sup>1</sup> Professor of Orthopaedic Surgery and Musculoskeletal Science  
Dani Prieto-Alhambra<sup>2\*</sup>, Professor of Pharmaco- and Device Epidemiology  
Dominic Furniss,<sup>1,3\*</sup> Associate Professor of Plastic Surgery

#### **Authors affiliation**

1. Oxford NIHR Musculoskeletal Biomedical Research Unit, Nuffield Department of Orthopaedics, Rheumatology and Musculoskeletal Sciences, Nuffield Orthopaedic Centre, University of Oxford, Windmill Road, Oxford, OX3 7LD, UK
2. Centre for Statistics in Medicine, NDORMS, University of Oxford, Windmill Road, Oxford, OX3 7LD, UK
3. Department of Plastic and Reconstructive Surgery, Nuffield Orthopaedic Centre, Windmill Road, Oxford, OX3 7HE, UK

\* These authors co-directed this work

**Correspondence to** Dominic Furniss, NDORMS, Oxford University, Botnar Research Centre, Oxford, OX3 7LD, UK. ORCID ID ( <https://orcid.org/0000-0003-2780-7173>) Twitter handle (@dominicfurniss) [dominic.furniss@ndorms.ox.ac.uk](mailto:dominic.furniss@ndorms.ox.ac.uk)  
++441865227233

**Supplementary Table S1:** DD diagnostic (ICD v10) and operative codes (OPCS v4.4, 4.5, 4.6, 4.7) for surgical treatment

| Grouping         | Condition                                      | OPCS-4 code |                 | ICD-10 code |
|------------------|------------------------------------------------|-------------|-----------------|-------------|
|                  | Palmar fascial fibromatosis (DD)               | T521        |                 | M720        |
| LF               | Palmar fasciectomy                             |             |                 |             |
|                  | Revision of palmar fasciectomy                 | T522        |                 |             |
|                  | Digital fasciectomy                            | T525        |                 |             |
|                  | Revision of digital fasciectomy                | T526        |                 |             |
| DF               | Dermofasciectomy                               | T561        |                 |             |
|                  | Revision of dermofasciectomy                   | T562        |                 |             |
| PNF              | Division of palmar fascia                      | T541        | Linked with (+) | M720        |
|                  | Other specified division of fascia             | T548        |                 |             |
|                  | Unspecified division of fascia                 | T549        |                 |             |
|                  | Other specified release of fascia              | T558        |                 |             |
|                  | Unspecified release of fascia                  | T559        |                 |             |
| LF               | Other specified excision of other fascia       | T528        |                 |             |
|                  | Unspecified excision of other fascia           | T529        |                 |             |
|                  | Other specified other excision of other fascia | T568        |                 |             |
|                  | Unspecified other excision of other fascia     | T569        |                 |             |
| Anatomical codes | Hand NEC                                       | Z894        |                 |             |
|                  | Thumb NEC                                      | Z895        |                 |             |
|                  | Finger NEC                                     | Z896        |                 |             |
|                  | Multiple digits of hand NEC                    | Z897        |                 |             |
|                  | Skin of finger                                 | Z503        |                 |             |
|                  | Bilateral operation                            | Z941        |                 |             |
|                  | Right sided operation                          | Z942        |                 |             |
|                  | Left sided operation                           | Z943        |                 |             |
|                  | Unilateral sided operation                     | Z944        |                 |             |
|                  | Specified laterality NEC                       | Z948        |                 |             |
|                  | Laterality NEC                                 | Z949        |                 |             |

**Supplementary Table S2a:** DD diagnostic (ICD v10) and operative codes (OPCS v4.4, 4.5, 4.6, 4.7) for local postoperative complications

| Grouping                   | Condition                                                                          | OPCS-4 code                                                                                                                                                                                                             | Linking         | ICD-10 code  |
|----------------------------|------------------------------------------------------------------------------------|-------------------------------------------------------------------------------------------------------------------------------------------------------------------------------------------------------------------------|-----------------|--------------|
| <b>Local complications</b> | Wound complications: surgical site infection (SSI) that required wound debridement | (Z894 or Z895 or Z896 or Z897 or Z898 or Z503) + (T963 or T964 or T968 or T969)                                                                                                                                         | Linked with (+) | T814 or L025 |
|                            | Wound complications: wound dehiscence that required closure                        | (Z894 or Z895 or Z896 or Z897 or Z898 or Z503) + (S604 or S422 or S423 or S424)                                                                                                                                         |                 |              |
|                            | Neurovascular injury (that required repair)                                        | (Z894 or Z895 or Z896 or Z897 or Z898 or Z503) + (A641 or A642 or A643 or A644 or A648 or A649 or A621 or A622 or A623 or A624 or A625 or A626 or A627 or A628 or A629 and A631 or A632 or A638 or A639 or A64 or Z097) | Linked with (+) | T810 or T812 |
|                            | Tendon injury (that required tendon repair)                                        | (Z894 or Z895 or Z896 or Z897 or Z898 or Z503) + (T671 or T672 or T673 or T674 or T675 or T676 or T678 or T679)                                                                                                         |                 |              |
|                            | Finger amputation                                                                  | X082 or X083 or X084                                                                                                                                                                                                    |                 |              |

**Supplementary Table S2b:** DD diagnostic (ICD v10) codes for serious systemic postoperative complications

| Grouping                              | Condition                                                                                                                   | ICD-10 code                                                                              |
|---------------------------------------|-----------------------------------------------------------------------------------------------------------------------------|------------------------------------------------------------------------------------------|
| <b>Serious systemic complications</b> | Stroke (excluding mini-stroke)                                                                                              | I60X or I61X or I62X or I63X or I64X                                                     |
|                                       | Lower respiratory tract infection (LRTI): (pneumonia, aspiration pneumonia, lung abscess with pneumonia, COPD exacerbation) | J12X or J13X or J14X or J15X or J16X or J18x J20X or J22 or J86X or J440 or J851 or J690 |
|                                       | Acute myocardial infarction (AMI)                                                                                           | I21X or I22X                                                                             |
|                                       | Pulmonary embolism (PE)                                                                                                     | I26X                                                                                     |
|                                       | Urinary tract infection (UTI)                                                                                               | N300 or N308 or N309 or N390 or N10                                                      |
|                                       | Acute renal failure (ARF)                                                                                                   | N170 or N171 or N172 or N178 or N179 or N990                                             |
|                                       | Death                                                                                                                       | Extracted from the Office for National Statistics (ONS) mortality data                   |

**Supplementary Table S3: Ethnicity grouping and frequency of each ethnic category**

| <b>Grouped ethnicity</b>           | <b>Original categories</b>                                                                                                                                               | <b>Frequency*</b>   |
|------------------------------------|--------------------------------------------------------------------------------------------------------------------------------------------------------------------------|---------------------|
| <b>White</b>                       | British (White), Irish (White), any other white background                                                                                                               | 105,822<br>(98.58%) |
| <b>Asian</b>                       | Indian, Indian (Asian or Asian British), Bangladeshi, Bangladeshi (Asian or Asian British), Pakistani, Chinese, Chinese (other ethnic group), any other Asian background | 589 (0.55%)         |
| <b>Black</b>                       | Black (Caribbean), Black (African), Caribbean (Black or Black British), African (Black or Black British), any other Black background                                     | 357 (0.33%)         |
| <b>Mixed ethnicity</b>             | Any other mixed background , White and Black Caribbean (Mixed), White and Black African (Mixed), White and Asian (Mixed)                                                 | 159 (0.15%)         |
| <b>Any other ethnicity</b>         | Any other ethnicity                                                                                                                                                      | 423 (0.39%)         |
| <b>Unknown ethnicity (missing)</b> | Not given, not stated, not known                                                                                                                                         | 14,138<br>(11.64%)  |
| <b>Total</b>                       |                                                                                                                                                                          | 121,488<br>(100%)   |

\*Denominator for all groups except missing=107,350 (total without missing observations)

**Supplementary Table S4: Index of multiple deprivation (IMD) deciles**

| <b>IMD deciles</b>                     | <b>Number of patients</b> | <b>Frequency (%)*</b> |
|----------------------------------------|---------------------------|-----------------------|
| <b>Least deprived 10% (Decile 1)</b>   | 13,715                    | 11.4                  |
| <b>Less deprived 10-20% (Decile 2)</b> | 14,383                    | 11.9                  |
| <b>Less deprived 20-30% (Decile 3)</b> | 14,764                    | 12.3                  |
| <b>Less deprived 30-40% (Decile 4)</b> | 14,442                    | 12.0                  |
| <b>Less deprived 40-50% (Decile 5)</b> | 13,564                    | 11.3                  |
| <b>More deprived 40-50% (Decile 6)</b> | 12,349                    | 10.3                  |
| <b>More deprived 30-40% (Decile 7)</b> | 10,958                    | 9.1                   |
| <b>More deprived 20-30% (Decile 8)</b> | 9,686                     | 8.0                   |
| <b>More deprived 10-20% (Decile 9)</b> | 8,520                     | 7.1                   |
| <b>Most deprived 10% (Decile 10)</b>   | 7,983                     | 6.6                   |
| <b>Missing</b>                         | 1,124                     | 0.93**                |
| <b>Total</b>                           | 121,488                   | 100                   |

\*Denominator=120,364 (total without missing IMD deciles)

\*\*Denominator=121,488

**Supplementary Table S5: Characteristics of patients in each SCCS cohort**

|                                                 | <b>LRTI cohort<br/>(n=429)</b> | <b>UTI cohort<br/>(n=300)</b> | <b>Stroke cohort<br/>(n=180)</b> | <b>AKI cohort<br/>(n=178)</b> | <b>MI cohort<br/>(n=140)</b> | <b>PE cohort<br/>(n=67)</b> |
|-------------------------------------------------|--------------------------------|-------------------------------|----------------------------------|-------------------------------|------------------------------|-----------------------------|
| <b>Index surgery</b>                            |                                |                               |                                  |                               |                              |                             |
| PNF, n (%)                                      | 58<br>(13.52)                  | 31<br>(10.33)                 | 24<br>(13.33)                    | 26<br>(14.61)                 | 19<br>(13.57)                | <6**                        |
| LF, n (%)                                       | 357<br>(83.22)                 | 259<br>(86.33)                | 151<br>(83.89)                   | 149<br>(83.71)                | 116<br>(82.86)               | 58<br>(86.57)               |
| DF, n (%)                                       | 14<br>(3.26)                   | 10<br>(3.33)                  | <6**                             | <6**                          | <6**                         | <6**                        |
| <b>Age at time of surgery, mean (SD)</b>        | 70.31<br>(9.89)                | 70.94<br>(10.56)              | 69.89<br>(9.01)                  | 70.28<br>(10.50)              | 69.98<br>(9.79)              | 68.45<br>(9.89)             |
| <b>Gender (Males), n (%)</b>                    | 355<br>(82.75)                 | 215<br>(71.67)                | 151<br>(83.89)                   | 145<br>(81.46)                | 122<br>(87.14)               | 50<br>(74.63)               |
| <b>Ethnicity</b>                                |                                |                               |                                  |                               |                              |                             |
| White, n (%)                                    | 392<br>(98.49)                 | 260<br>(97.01)                | 159<br>(100)                     | 166<br>(98.81)                | 129<br>(98.47)               | 57<br>(98.28)               |
| Others, n (%)                                   | 6<br>(1.51)                    | 8<br>(2.99)                   | 0                                | <6**                          | <6**                         | <6**                        |
| Missing, n (%)                                  | 31<br>(7.23)                   | 32<br>(10.67)                 | 21<br>(11.67)                    | 10<br>(5.62)                  | 9<br>(6.43)                  | 9<br>(13.43)                |
| <b>Charlson Comorbidity Index, median (IQR)</b> | 1<br>(1-3)                     | 1<br>(1-3)                    | 1<br>(1-2)                       | 1<br>(2-5)                    | 1<br>(1-3)                   | 1<br>(1-2)                  |
| <b>IMD deciles, n (%)</b>                       |                                |                               |                                  |                               |                              |                             |
| Less and least deprived 50%                     | 215<br>(50.23)                 | 137<br>(45.67)                | 80<br>(52.02)                    | 91<br>(51.40)                 | 58<br>(41.72)                | 27<br>(40.32)               |
| More and most deprived 50%                      | 213<br>(49.76)                 | 163<br>(54.34)                | 97<br>(54.79)                    | 86<br>(48.58)                 | 81<br>(58.27)                | 40<br>(59.66)               |
| Missing                                         | 1<br>(0.23)                    | 0                             | 3<br>(1.67)                      | 1<br>(0.56)                   | 1<br>(0.71)                  | 0                           |

\*Percentages for all categories were based on the total without missing as a denominator except missing category where the total was its denominator (complete case analysis)

\*\*Counts of 5 or less are suppressed to prevent secondary patient identification, as per NHS Digital and ONS guidance.



**Supplementary Table S6:** Incidence rate ratio (IRR) and 95% CI for serious systemic adverse events within 30 and 90 days of each first primary DD surgery (PNF vs. LF or DF) compared to each adverse event in the baseline period

| Complication                             | Type of surgery | Incidence rate ratio (IRR) (95% CI) for 30-day period | Incidence rate ratio (IRR) (95% CI) for 90-day period |
|------------------------------------------|-----------------|-------------------------------------------------------|-------------------------------------------------------|
| <b>Lower respiratory tract infection</b> | PNF             | 0.46 (0.18-1.21)                                      | 0.89 (0.49-1.61)                                      |
|                                          | LF or DF        | 1.40 (0.93-2.10)                                      | <b>1.30 (1.03-1.63)</b>                               |
| <b>Urinary tract infection</b>           | PNF             | 0.67 (0.11-3.99)                                      | 0.82 (0.38-1.74)                                      |
|                                          | LF or DF        | 1.10 (0.72-1.65)                                      | 1.28 (0.98-1.67)                                      |
| <b>Stroke (excluding mini-stroke)</b>    | PNF             | 4.00 (0.45-35.79)                                     | 1.30 (0.52-3.27)                                      |
|                                          | LF or DF        | 0.60 (0.32-1.11)                                      | 1.10 (0.78-1.57)                                      |
| <b>Acute kidney injury</b>               | PNF             | 1.33 (0.30-5.96)                                      | 2.02 (0.86-4.72)                                      |
|                                          | LF or DF        | 1.81 (0.95-3.45)                                      | <b>1.49 (1.03-2.13)</b>                               |
| <b>Myocardial infarction</b>             | PNF             | 4.00 (0.45-35.79)                                     | 1.83 (0.68-4.96)                                      |
|                                          | LF or DF        | <b>2.36 (1.17-4.78)</b>                               | <b>2.24 (1.49-3.35)</b>                               |
| <b>Pulmonary embolism</b>                | PNF             | *                                                     | 1 (0.14-7.10)                                         |
|                                          | LF or DF        | 1.57 (0.61-4.05)                                      | 1.59 (0.93-2.72)                                      |

\*The incidence of adverse event was too low to allow the SCCS model to converge
